# Supplementary material for: Sleep Movements and Respiratory Coupling as a Biobehavioral Marker for Early Alzheimer’s Disease in Independently Dwelling Adults
Source: Research Square preprint supplement (doi:10.21203/rs.3.rs-1898948/v1), 2022-08-03
Supplement: Supplementary file 1 [file 7b6450700343d594bf498a7f.docx]

**Table 4. Nocturnal Actigraphy in MCI-DX, MCI-CON and NC Groups**

**Actigraphy Variable          MCI-DX           MCI-CON              NC                     p**
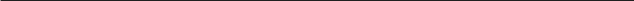


Wake Bout Time (WBT, min) 2.67                         2.79a                           2.32a                        0.04a

Sleep Fragmentation (SF, freq) 45.75a,b                        35.62b          32.79a                 0.008; 0.041b

Total Sleep Time (TST, min)           379.94a                     431.89         454.30a            0.01a

Sleep Efficiency (SE, %) 76.74a                       83.65a           82.01            0.02a

Sleep Latency (SL, min) 44.08a                       13.84a           27.85            0.008a

Mean Activity Score (MA, freq) 13.63                       18.67a          12.76a                        0.006a
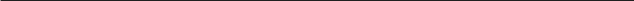


Note. Multivariable Regression of MCI status and Actigraphy (mean = 6.7 nights) measures adjusted with covariates age, current depression,  years of education, and BMI were significant for these parameters WBT, SF, TST, SE, SL, M.A. (p<.000); post-hoc group differences are shown (p<.001-.05) with superscript letters (a,b) reflect pairwise differences. No group findings for time in bed, actual sleep percent, actual wake percent, sleep bouts, wake bouts, sleep bout time, immobile percent time, number of minutes moving, moving percent time, number of immobile phases, mean length immobility, mean one minute immobility, total activity score, wake after sleep onset (WASO), S.D. of activity counts, or largest activity count.
