# Supplementary material for: Sleep Movements and Respiratory Coupling as a Biobehavioral Marker for Early Alzheimer’s Disease in Independently Dwelling Adults
Source: Research Square preprint supplement (doi:10.21203/rs.3.rs-1898948/v1), 2022-08-03
Supplement: Supplementary file 2 [file 8d6a85f3acf74810f5fb32ee.docx]

**Table 5.  Sleep Questionnaire Scores across Groups**

**MCI Status**

**Questionnaire         MCI-DX (SD)              MCI-CON (SD)                 _NC (SD)**

ESS (total) -        3.40 (3.98)                     5.94 (3.53)                     5.24 (3.74)

ESS (avg)            0.49 (0.63)     0.74 (0.44)            0.66 (0.47)

SSS (avg)             1.89 (0.53)       0.90 (0.60)             1.62 (0.49)

PSQI (comp 1)           0.73 (0.80)      0.85 (0.67)             0.91 (0.82)

PSQI (comp 2)            1.33 (0.98)     0.88 (0.99)          1.07 (0.91)

PSQI (comp 3)             0.67 (0.72)     0.94 (0.79)           0.69 (0.76)

PSQI (comp 4)           0.67 (0.98)   0.79 (1.08)          0.71 (0.84)

PSQI (comp 7)           0.52 (0.52)   0.79 (0.99)           0.67 (0.80)

PSQI (sum)           6.67 (3.81)   6.52 (4.03)          6.42 (3.55)

Note. Summary Scores for ESS: Epworth Sleepiness Scale; SSS: Stanford Sleepiness Scale; PSQI: Pittsburgh Sleep Quality Index (comp 1: Sleep Quality; comp 2: Sleep Latency; comp 3: Sleep Duration; comp 4: Sleep Efficiency; comp 7: Daytime Dysfunction) by MCI Status (MCI-DX: MCI Diagnosed; MCI-CON: MCI Consensus; NC: Normal Comparison). No statistically significant group differences were identified with our standard adjusted multivariable regression model.
